# Supplementary material for: Multidrug-Resistant and Clinically Relevant Gram-Negative Bacteria Are Present in German Surface Waters
Source: PubMed Central journal article supplement (PMC6896662; doi:10.3389/fmicb.2019.02779), 2019-11-29
Supplement: Data_Sheet_1.pdf [file Data_Sheet_1.pdf]

## *Supplementary Material*

### **1 Supplementary Data**

Not applicable

### **2 Supplementary Figures and Tables**

Supplementary table 1: Description of sampling sites. All but number nine are displayed in Supplementary Figure 1.

| #  | Sampling date | Sampling site                                                 | Sampling site detail                                                                                                                                                                                            |
|----|---------------|---------------------------------------------------------------|-----------------------------------------------------------------------------------------------------------------------------------------------------------------------------------------------------------------|
| 1  | 10/10/2017    | River after urban wastewater treatment plant                  | On the bank of the stream (mid-size river); on the side of the treatment plant, about 500 meters behind the treatment plant.                                                                                    |
| 2  | 10/10/2017    | Lake for recreational use                                     | At a small beach (official bathing area).                                                                                                                                                                       |
| 3  | 10/10/2017    | River at a plant for meat and bone meal                       | On the bank of a small river receiving the treated sewage; on the opposite side of the plant, about 50 meters behind the discharge of the plant.                                                                |
| 4  | 10/10/2017    | Brook at agriculturally used area (field)                     | In a brook directly on the edge of the field.                                                                                                                                                                   |
| 5  | 10/10/2017    | Brook at agriculturally used area (field)                     | In a brook between a small housing estate and fields, about 50 meters downstream from the nearest field.                                                                                                        |
| 6  | 10/11/2017    | Reservoir lake for recreational use                           | At a beach (official bathing area)                                                                                                                                                                              |
| 7  | 10/11/2017    | River downstream of discharged wastewater                     | On the bank of the stream (mid-size river); on the opposite side of the treatment plant, about 20 meters behind the outflow of the treatment plant.                                                             |
| 8  | 10/11/2017    | Brook near a meat (poultry) processing plant                  | In a brook about 200 meters behind the outflow of the treatment plant of the factory.                                                                                                                           |
| 9  | 10/12/2017    | Rivulet at a nursing home                                     | In a brook about 20 meters behind the outflow of the treatment of the nursing home.                                                                                                                             |
| 10 | 10/12/2017    | River at a slaughterhouse                                     | On the bank of the stream (mid-size river); about 20 meters behind the outflow of the treatment plant of the factory.                                                                                           |
| 11 | 11/14/2017    | Effluent of a hospital                                        | Underground sewer at a large hospital                                                                                                                                                                           |
| 12 | 11/14/2017    | River downstream of discharge of treated municipal wastewater | In the river directly after the outflow (about 20 meters distance) of the large urban wastewater treatment plant receiving the wastewater from the whole city and the regional hospital (see sampling site 11). |

Supplementary table 2: Reference isolates for determination of *Enterobacter* species.

| Species                            | Strain        | Accession number |
|------------------------------------|---------------|------------------|
| <i>Enterobacter asburiae</i>       | ATCC 35953    | CP011863         |
| <i>Enterobacter bugandensis</i>    | EB-247        | FYBI00000000     |
| <i>Enterobacter cancerogenus</i>   | ATCC 33241    | NZ_FYBA00000000  |
| <i>Enterobacter chengduensis</i>   | WCHECI-C4     | MTSO00000000     |
| <i>Enterobacter chuandaensis</i>   | 090028T       | QZCS00000000     |
| <i>Enterobacter cloacae</i>        | ATCC 13047    | CP001918         |
| <i>Enterobacter hormaechei</i>     | ATCC 49162    | MKEQ00000000     |
| <i>Enterobacter huaxiensis</i>     | 090008T       | QZCT00000000     |
| <i>Enterobacter kobei</i>          | DSM 13645     | CP017181         |
| <i>Enterobacter ludwigii</i>       | EN-119        | CP017279         |
| <i>Enterobacter mori</i>           | LMG 25706     | AEXB00000000     |
| <i>Enterobacter roggkampii</i>     | DSM 16690     | NZ_CP017184      |
| <i>Enterobacter sichuanensis</i>   | WCHECL1597    | POVL00000000     |
| <i>Enterobacter soli</i>           | ATCC BAA-2102 | LXES00000000     |
| <i>Enterobacter timonensis</i>     | mt20          | FCOP00000000     |
| <i>Enterobacter xiangfangensis</i> | LMG27195      | CP017183         |

Supplementary table 3: Colony forming units in water and sediment samples obtained on ESBL Chromagar plates. The number of bacterial colonies was calculated to colonies per 100mL water or 1g sediment samples. \* in these sampling sites, no sediment sample was taken.

| Sampling site | Sample   | Concentration (CFU/100 mL or 1g sediment sample) |
|---------------|----------|--------------------------------------------------|
| 1             | water    | 11.5                                             |
|               | sediment | 0                                                |
| 2             | water    | 2.7                                              |
|               | sediment | 0                                                |
| 3             | water    | 15.8                                             |
|               | sediment | 0                                                |
| 4             | water    | 0                                                |
|               | sediment | 0                                                |
| 5             | water    | 0                                                |
|               | sediment | 0                                                |
| 6             | water    | 6.6                                              |
|               | sediment | 0.1                                              |
| 7             | water    | 68.5                                             |
|               | sediment | 0                                                |
| 8             | water    | 46.3                                             |
|               | sediment | 15.0                                             |
| 9             | water    | 41.8                                             |
|               | sediment | 0                                                |
| 10            | water    | 44.0                                             |
|               | sediment | 0                                                |
| 11*           | water    | 8130                                             |
| 12*           | water    | 3865                                             |

Supplementary Table 4: Antimicrobial resistance testing data values of the seven species depicted in figure 2; the first number in the name of the isolates depicts, from which sampling site they were isolated (as described in Supplementary Table 3); s, source soil, w, source water; AM, Ampicillin; CAZ, Ceftazidim; CIP, Ciprofloxacin; CPD, Cefpodoxim; CTX, Cefotaxim; CXM, Cefuroxim; ETP, Ertapenem; GM, Gentamicin; IPM, Imipenem; MEM, Meropenem; MXF, Moxifloxacin; SAM, Ampicillin/Sulbactam; SXT, Trimethoprim/Sulfamethoxazol; TE, Tetracyclin; TGC, Tigecycline; TZP, Piperacillin/Tazobactam; (-) the MIC of these antibiotics was not determined. Sequenced isolates are marked in yellow.

| Isolate | Species                   | AM   | CAZ  | CIP    | CPD | CTX  | CXM  | GM  | ETP   | IPM    | MEM    | MXF    | SAM  | SXT   | TE   | TGC   | TZP   |
|---------|---------------------------|------|------|--------|-----|------|------|-----|-------|--------|--------|--------|------|-------|------|-------|-------|
| 1w-1    | <i>Escherichia coli</i>   | >=32 | <=1  | >=4    | >=8 | >=64 | >=64 | <=1 | <=0,5 | <=0,25 | <=0,25 | >=8    | 16   | >=320 | <=1  | <=0,5 | <=4   |
| 1w-2    | <i>Escherichia coli</i>   | >=32 | 16   | <=0,25 | >=8 | >=64 | >=64 | <=1 | <=0,5 | <=0,25 | <=0,25 | 2      | 16   | >=320 | <=1  | <=0,5 | <=4   |
| 1w-3    | <i>Escherichia coli</i>   | >=32 | 16   | 0,5    | >=8 | >=64 | >=64 | <=1 | <=0,5 | <=0,25 | <=0,25 | 2      | 16   | >=320 | >=16 | <=0,5 | <=4   |
| 1w-4    | <i>Escherichia coli</i>   | >=32 | <=1  | <=0,25 | >=8 | >=64 | >=64 | <=1 | <=0,5 | <=0,25 | <=0,25 | <=0,25 | 16   | <=20  | <=1  | <=0,5 | <=4   |
| 1w-5    | <i>Escherichia coli</i>   | >=32 | <=1  | >=4    | >=8 | 16   | >=64 | <=1 | <=0,5 | <=0,25 | <=0,25 | >=8    | 16   | <=20  | <=1  | <=0,5 | <=4   |
| 1w-6    | <i>Escherichia coli</i>   | >=32 | 4    | >=4    | >=8 | >=64 | >=64 | <=1 | <=0,5 | <=0,25 | <=0,25 | >=8    | 16   | >=320 | >=16 | <=0,5 | <=4   |
| 1w-7    | <i>Escherichia coli</i>   | >=32 | >=64 | 0,5    | >=8 | >=64 | >=64 | <=1 | <=0,5 | <=0,25 | <=0,25 | 2      | >=32 | >=320 | >=16 | <=0,5 | <=4   |
| 1w-8    | <i>Escherichia coli</i>   | >=32 | <=1  | 0,5    | >=8 | >=64 | >=64 | <=1 | <=0,5 | <=0,25 | <=0,25 | 2      | <=2  | <=20  | <=1  | <=0,5 | <=4   |
| 1w-9    | <i>Klebsiella oxytoca</i> | >=32 | <=1  | <=0,25 | 2   | <=1  | >=64 | <=1 | <=0,5 | <=0,25 | <=0,25 | <=0,25 | >=32 | <=20  | <=1  | <=0,5 | >=128 |

| Isolate | Species                        | AM   | C AZ | CIP    | CP D | CTX  | CXM  | GM   | ETP   | IPM    | MEM    | MXF    | SAM  | SXT   | TE   | TGC   | TZP   |
|---------|--------------------------------|------|------|--------|------|------|------|------|-------|--------|--------|--------|------|-------|------|-------|-------|
| 1w-10   | <i>Klebsiella pneumoniae</i>   | >=32 | >=64 | 2      | >=8  | >=64 | >=64 | <=1  | <=0,5 | <=0,25 | <=0,25 | 2      | >=32 | >=320 | >=16 | 2     | >=128 |
| 1w-11   | <i>Citrobacter freundii</i>    | >=32 | >=64 | <=0,25 | >=8  | >=64 | >=64 | <=1  | <=0,5 | <=0,25 | <=0,25 | 2      | >=32 | <=20  | <=1  | <=0,5 | 16    |
| 1w-12   | <i>Acinetobacter baumannii</i> | (-)  | 4    | <=0,25 | (-)  | 16   | (-)  | <=1  | 4(-)  | <=0,25 | 0,5    | (-)    | <=2  | <=20  | 2    | <=0,5 | 8     |
| 1w-13   | <i>Acinetobacter baumannii</i> | (-)  | 4    | <=0,25 | (-)  | 16   | (-)  | <=1  | (-4)  | <=0,25 | <=0,25 | (-)    | <=2  | <=20  | <=1  | <=0,5 | <=4   |
| 1w-14   | <i>Acinetobacter baumannii</i> | (-)  | 4    | <=0,25 | (-)  | 8    | (-)  | <=1  | (-4)  | <=0,25 | <=0,25 | (-)    | <=2  | <=20  | <=1  | <=0,5 | <=4   |
| 1w-15   | <i>Acinetobacter baumannii</i> | (-)  | 4    | <=0,25 | (-)  | 16   | (-)  | <=1  | (-4)  | <=0,25 | <=0,25 | (-)    | <=2  | <=20  | <=1  | <=0,5 | 8     |
| 1w-16   | <i>Acinetobacter baumannii</i> | (-)  | 4    | <=0,25 | (-)  | 16   | (-)  | <=1  | (-4)  | <=0,25 | <=0,25 | (-)    | <=2  | <=20  | <=1  | <=0,5 | 8     |
| 1w-17   | <i>Acinetobacter baumannii</i> | (-)  | 4    | <=0,25 | (-)  | 8    | (-)  | <=1  | (-4)  | <=0,25 | <=0,25 | (-)    | <=2  | <=20  | <=1  | <=0,5 | 8     |
| 1w-18   | <i>Acinetobacter baumannii</i> | (-)  | 4    | <=0,25 | (-)  | 8    | (-)  | <=1  | (-4)  | <=0,25 | <=0,25 | (-)    | <=2  | <=20  | <=1  | <=0,5 | <=4   |
| 1w-19   | <i>Acinetobacter baumannii</i> | (-)  | 8    | <=0,25 | (-)  | 32   | (-)  | <=1  | 4(-)  | <=0,25 | <=0,25 | (-)    | <=2  | <=20  | <=1  | <=0,5 | 8     |
| 2w-1    | <i>Escherichia coli</i>        | >=32 | <=1  | 0,5    | >=8  | >=64 | >=64 | <=1  | <=0,5 | <=0,25 | <=0,25 | 2      | 16   | <=20  | <=1  | <=0,5 | <=4   |
| 2w-2    | <i>Escherichia coli</i>        | >=32 | 8    | <=0,25 | >=8  | >=64 | >=64 | <=1  | <=0,5 | <=0,25 | <=0,25 | <=0,25 | 16   | <=20  | >=16 | <=0,5 | <=4   |
| 2w-3    | <i>Escherichia coli</i>        | >=32 | <=1  | >=4    | >=8  | >=64 | >=64 | >=16 | <=0,5 | <=0,25 | <=0,25 | >=8    | 16   | <=20  | >=16 | <=0,5 | <=4   |
| 2w-4    | <i>Acinetobacter baumannii</i> | (-)  | 4    | <=0,25 | (-)  | 8    | (-)  | <=1  | 4(-)  | <=0,25 | <=0,25 | (-)    | <=2  | <=20  | <=1  | <=0,5 | <=4   |

| Isolate | Species                        | AM  | C AZ | CIP   | CP D | CTX | CXM | GM  | ETP  | IPM   | MEM   | MXF   | SAM | SXT  | TE  | TGC  | TZP  |
|---------|--------------------------------|-----|------|-------|------|-----|-----|-----|------|-------|-------|-------|-----|------|-----|------|------|
| 2w-5    | <i>Acinetobacter baumannii</i> | (-) | 4    | ≤0,25 | (-)  | 16  | (-) | ≤1  | (-)4 | ≤0,25 | ≤0,25 | (-)   | ≤2  | ≤20  | ≤1  | ≤0,5 | ≤4   |
| 2w-6    | <i>Acinetobacter baumannii</i> | (-) | 4    | ≤0,25 | (-)  | 16  | (-) | ≤1  | (-)4 | ≤0,25 | ≤0,25 | (-)   | ≤2  | ≤20  | ≤1  | ≤0,5 | ≤4   |
| 2w-7    | <i>Acinetobacter baumannii</i> | (-) | 4    | ≤0,25 | (-)  | 8   | (-) | ≤1  | (-)4 | ≤0,25 | ≤0,25 | (-)   | ≤2  | ≤20  | ≤1  | ≤0,5 | ≤4   |
| 3w-1    | <i>Escherichia coli</i>        | ≥32 | 4    | ≤0,25 | ≥8   | ≥64 | ≥64 | ≤1  | ≤0,5 | ≤0,25 | ≤0,25 | ≤0,25 | ≥32 | ≥320 | ≤1  | ≤0,5 | ≤4   |
| 3w-2    | <i>Escherichia coli</i>        | ≥32 | 4    | ≤0,25 | ≥8   | 8   | ≥64 | ≤1  | ≤0,5 | ≤0,25 | ≤0,25 | ≤0,25 | ≤2  | ≤20  | ≤1  | ≤0,5 | ≤4   |
| 3w-3    | <i>Escherichia coli</i>        | ≥32 | ≤1   | ≤0,25 | ≥8   | 4   | ≥64 | ≤1  | ≤0,5 | ≤0,25 | ≤0,25 | ≤0,25 | 16  | ≤20  | ≤1  | ≤0,5 | ≤4   |
| 3w-4    | <i>Escherichia coli</i>        | ≥32 | 4    | ≥4    | ≥8   | 8   | ≥64 | ≤1  | ≤0,5 | ≤0,25 | ≤0,25 | ≥8    | ≥32 | ≤20  | ≥16 | ≤0,5 | ≤4   |
| 3w-5    | <i>Escherichia coli</i>        | ≥32 | ≤1   | ≥4    | ≥8   | 8   | ≥64 | ≤1  | ≤0,5 | ≤0,25 | ≤0,25 | ≥8    | 16  | ≥320 | ≥16 | ≤0,5 | ≤4   |
| 3w-6    | <i>Escherichia coli</i>        | ≥32 | 16   | ≥4    | ≥8   | ≥64 | ≥64 | ≥16 | ≤0,5 | ≤0,25 | ≤0,25 | ≥8    | 16  | ≥320 | ≥16 | ≤0,5 | ≤4   |
| 3w-7    | <i>Escherichia coli</i>        | ≥32 | 4    | ≥4    | ≥8   | ≥64 | ≥64 | ≤1  | ≤0,5 | ≤0,25 | ≤0,25 | ≥8    | ≤2  | ≤20  | ≤1  | ≤0,5 | ≤4   |
| 3w-8    | <i>Escherichia coli</i>        | ≥32 | 4    | ≥4    | ≥8   | ≥64 | ≥64 | ≤1  | ≤0,5 | ≤0,25 | ≤0,25 | ≥8    | ≥32 | ≤20  | ≥16 | ≤0,5 | ≤4   |
| 3w-9    | <i>Klebsiella pneumoniae</i>   | ≥32 | 8    | ≥4    | ≥8   | ≥64 | ≥64 | ≤1  | ≤0,5 | ≤0,25 | ≤0,25 | ≥8    | ≥32 | ≥320 | ≤1  | 1    | 8    |
| 3w-10   | <i>Klebsiella oxytoca</i>      | ≥32 | ≤1   | ≥4    | 4    | ≤1  | ≥64 | ≤1  | ≤0,5 | ≤0,25 | ≤0,25 | ≥8    | ≥32 | ≤20  | ≤1  | ≤0,5 | ≥128 |
| 3w-11   | <i>Acinetobacter baumannii</i> | (-) | 4    | ≤0,25 | (-)  | 8   | (-) | ≤1  | 4(-) | ≤0,25 | ≤0,25 | (-)   | ≤2  | ≤20  | ≤1  | ≤0,5 | ≤4   |

| Isolate | Species                        | AM  | C AZ | CIP   | CP D | CTX | CXM | GM | ETP  | IPM   | MEM   | MXF   | SAM | SXT  | TE  | TGC  | TZP  |
|---------|--------------------------------|-----|------|-------|------|-----|-----|----|------|-------|-------|-------|-----|------|-----|------|------|
| 3w-12   | <i>Acinetobacter baumannii</i> | (-) | 8    | ≤0,25 | (-)  | 32  | (-) | ≤1 | 4(-) | ≤0,25 | 0,5   | (-)   | ≤2  | ≤20  | 2   | ≤0,5 | 16   |
| 3w-13   | <i>Acinetobacter baumannii</i> | (-) | 8    | ≤0,25 | (-)  | 32  | (-) | ≤1 | 4(-) | ≤0,25 | 0,5   | (-)   | ≤2  | ≤20  | 2   | ≤0,5 | 32   |
| 3w-14   | <i>Acinetobacter baumannii</i> | (-) | 4    | ≤0,25 | (-)  | 8   | (-) | ≤1 | 4(-) | ≤0,25 | ≤0,25 | (-)   | ≤2  | ≤20  | ≤1  | ≤0,5 | ≤4   |
| 3w-15   | <i>Acinetobacter baumannii</i> | (-) | 8    | ≤0,25 | (-)  | 16  | (-) | ≤1 | 4(-) | ≤0,25 | ≤0,25 | (-)   | ≤2  | ≤20  | ≤1  | ≤0,5 | 8    |
| 3w-16   | <i>Acinetobacter baumannii</i> | (-) | 8    | 0,5   | (-)  | 16  | (-) | ≤1 | 4(-) | ≤0,25 | ≤0,25 | (-)   | ≤2  | ≤20  | ≤1  | ≤0,5 | 16   |
| 3w-17   | <i>Acinetobacter baumannii</i> | (-) | 4    | ≤0,25 | (-)  | 8   | (-) | ≤1 | 4(-) | ≤0,25 | ≤0,25 | (-)   | ≤2  | ≤20  | ≤1  | ≤0,5 | ≤4   |
| 3w-18   | <i>Acinetobacter baumannii</i> | (-) | 8    | ≤0,25 | (-)  | 16  | (-) | ≤1 | 4(-) | ≤0,25 | ≤0,25 | (-)   | ≤2  | ≤20  | ≤1  | ≤0,5 | ≤4   |
| 6s-1    | <i>Acinetobacter baumannii</i> | (-) | 4    | ≤0,25 | (-)  | 16  | (-) | ≤1 | 4(-) | ≤0,25 | ≤0,25 | (-)   | ≤2  | ≤20  | ≤1  | ≤0,5 | ≤4   |
| 6w-1    | <i>Escherichia coli</i>        | ≥32 | ≤1   | ≤0,25 | ≥8   | ≥64 | ≥64 | ≤1 | ≤0,5 | ≤0,25 | ≤0,25 | ≤0,25 | 16  | ≥320 | ≥16 | ≤0,5 | ≤4   |
| 6w-2    | <i>Escherichia coli</i>        | ≥32 | ≤1   | ≤0,25 | ≥8   | 8   | ≥64 | ≤1 | ≤0,5 | ≤0,25 | ≤0,25 | ≤0,25 | 16  | ≥320 | ≤1  | ≤0,5 | ≤4   |
| 6w-3    | <i>Escherichia coli</i>        | ≥32 | ≤1   | ≤0,25 | ≥8   | ≥64 | ≥64 | ≤1 | ≤0,5 | ≤0,25 | ≤0,25 | ≤0,25 | 16  | ≥320 | ≤1  | ≤0,5 | ≤4   |
| 6w-4    | <i>Escherichia coli</i>        | ≥32 | ≤1   | ≤0,25 | ≥8   | 16  | ≥64 | ≤1 | ≤0,5 | ≤0,25 | ≤0,25 | ≤0,25 | 16  | ≤20  | ≤1  | ≤0,5 | ≤4   |
| 6w-7    | <i>Acinetobacter baumannii</i> | (-) | 8    | ≤0,25 | (-)  | 16  | (-) | ≤1 | 4    | ≤0,25 | ≤0,25 | (-)   | ≤2  | ≤20  | ≤1  | ≤0,5 | ≤4   |
| 6w-8    | <i>Acinetobacter baumannii</i> | (-) | ≥64  | ≤0,25 | (-)  | ≥64 | (-) | 2  | 4    | ≥16   | ≥16   | (-)   | ≥32 | ≤20  | ≤1  | ≤0,5 | ≥128 |



| Isolate | Species                        | AM   | C AZ | CIP    | CP D | CTX  | CXM  | GM   | ETP          | IPM    | MEM    | MXF    | SAM | SXT   | TE   | TGC   | TZP |
|---------|--------------------------------|------|------|--------|------|------|------|------|--------------|--------|--------|--------|-----|-------|------|-------|-----|
| 6w-9    | <i>Escherichia coli</i>        | (-)  | 16   | <=0,25 | (-)  | 16   | (-)  | <=1  | (-)          | <=0,25 | <=0,25 | (-)    | <=2 | <=20  | <=1  | <=0,5 | <=4 |
| 6w-10   | <i>Acinetobacter baumannii</i> | (-)  | 4    | <=0,25 | (-)  | 8    | (-)  | <=1  | (-)          | <=0,25 | <=0,25 | (-)    | <=2 | <=20  | <=1  | <=0,5 | <=4 |
| 7w-1    | <i>Escherichia coli</i>        | >=32 | 8    | <=0,25 | >=8  | 16   | >=64 | <=1  | <=0,5<br>(-) | <=0,25 | <=0,25 | <=0,25 | <=2 | <=20  | <=1  | <=0,5 | <=4 |
| 7w-2    | <i>Escherichia coli</i>        | 16   | 4    | <=0,25 | >=8  | 8    | >=64 | <=1  | 4            | <=0,25 | <=0,25 | <=0,25 | <=2 | <=20  | <=1  | <=0,5 | <=4 |
| 7w-3    | <i>Escherichia coli</i>        | >=32 | <=1  | <=0,25 | >=8  | 8    | >=64 | <=1  | <=0,5        | <=0,25 | <=0,25 | <=0,25 | 16  | <=20  | <=1  | <=0,5 | <=4 |
| 7w-4    | <i>Escherichia coli</i>        | >=32 | 4    | >=4    | >=8  | >=64 | >=64 | <=1  | <=0,5        | <=0,25 | <=0,25 | >=8    | <=2 | <=20  | <=1  | <=0,5 | <=4 |
| 7w-5    | <i>Escherichia coli</i>        | >=32 | 16   | >=4    | >=8  | >=64 | >=64 | <=1  | <=0,5        | <=0,25 | <=0,25 | >=8    | 16  | <=20  | >=16 | <=0,5 | <=4 |
| 7w-6    | <i>Escherichia coli</i>        | >=32 | 16   | >=4    | >=8  | >=64 | >=64 | <=1  | <=0,5        | <=0,25 | <=0,25 | >=8    | 16  | <=20  | >=16 | <=0,5 | <=4 |
| 7w-7    | <i>Escherichia coli</i>        | >=32 | 4    | >=4    | >=8  | >=64 | >=64 | <=1  | <=0,5        | <=0,25 | <=0,25 | >=8    | <=2 | <=20  | <=1  | <=0,5 | <=4 |
| 7w-8    | <i>Escherichia coli</i>        | >=32 | 8    | <=0,25 | >=8  | >=64 | >=64 | <=1  | <=0,5        | <=0,25 | <=0,25 | <=0,25 | 8   | >=320 | >=16 | <=0,5 | <=4 |
| 7w-9    | <i>Klebsiella pneumoniae</i>   | >=32 | <=1  | 0,5    | >=8  | >=64 | >=64 | >=16 | <=0,5        | <=0,25 | <=0,25 | 0,5    | 16  | >=320 | <=1  | <=0,5 | <=4 |
| 7w-10   | <i>Klebsiella pneumoniae</i>   | >=32 | <=1  | <=0,25 | >=8  | >=64 | >=64 | <=1  | <=0,5        | <=0,25 | <=0,25 | <=0,25 | 16  | <=20  | <=1  | <=0,5 | <=4 |
| 7w-11   | <i>Klebsiella pneumoniae</i>   | >=32 | 16   | <=0,25 | >=8  | >=64 | >=64 | <=1  | <=0,5        | <=0,25 | <=0,25 | <=0,25 | 16  | >=320 | <=1  | 1     | <=4 |

| Isolate | Species                        | AM  | C<br>AZ | CIP    | CP<br>D | CTX  | CXM | GM  | ETP  | IPM    | MEM    | MXF | SAM  | SXT   | TE   | TGC   | TZP |
|---------|--------------------------------|-----|---------|--------|---------|------|-----|-----|------|--------|--------|-----|------|-------|------|-------|-----|
| 7w-12   | <i>Acinetobacter baumannii</i> | (-) | 16      | <=0,25 | (-)     | >=64 | (-) | <=1 | 4(-) | <=0,25 | <=0,25 | (-) | 16   | >=320 | 8    | >=8   | 8   |
| 7w-13   | <i>Acinetobacter baumannii</i> | (-) | 4       | <=0,25 | (-)     | 16   | (-) | <=1 | 4(-) | <=0,25 | <=0,25 | (-) | <=2  | <=20  | <=1  | <=0,5 | <=4 |
| 7w-14   | <i>Acinetobacter baumannii</i> | (-) | 4       | <=0,25 | (-)     | 16   | (-) | <=1 | 4(-) | <=0,25 | <=0,25 | (-) | <=2  | <=20  | <=1  | <=0,5 | <=4 |
| 7w-15   | <i>Acinetobacter baumannii</i> | (-) | 4       | 0,5    | (-)     | 16   | (-) | <=1 | 4(-) | <=0,25 | 0,5    | (-) | <=2  | <=20  | <=1  | <=0,5 | 8   |
| 7w-16   | <i>Acinetobacter baumannii</i> | (-) | 4       | <=0,25 | (-)     | 8    | (-) | <=1 | 4(-) | <=0,25 | <=0,25 | (-) | <=2  | <=20  | <=1  | <=0,5 | <=4 |
| 7w-17   | <i>Acinetobacter baumannii</i> | (-) | 8       | <=0,25 | (-)     | 16   | (-) | <=1 | 4(-) | <=0,25 | <=0,25 | (-) | <=2  | <=20  | <=1  | <=0,5 | 8   |
| 7w-18   | <i>Acinetobacter baumannii</i> | (-) | 4       | <=0,25 | (-)     | 8    | (-) | <=1 | 4(-) | <=0,25 | <=0,25 | (-) | <=2  | <=20  | <=1  | <=0,5 | <=4 |
| 7w-19   | <i>Acinetobacter baumannii</i> | (-) | 4       | <=0,25 | (-)     | 16   | (-) | <=1 | 4(-) | <=0,25 | <=0,25 | (-) | <=2  | <=20  | <=1  | <=0,5 | 8   |
| 8s-1    | <i>Acinetobacter baumannii</i> | (-) | 16      | <=0,25 | (-)     | >=64 | (-) | <=1 | 4(-) | <=0,25 | <=0,25 | (-) | 16   | >=320 | 8    | >=8   | 8   |
| 8s-2    | <i>Acinetobacter baumannii</i> | (-) | 4       | 2      | (-)     | 16   | (-) | <=1 | 4(-) | <=0,25 | <=0,25 | (-) | <=2  | <=20  | >=16 | 4     | <=4 |
| 8s-3    | <i>Pseudomonas aeruginosa</i>  | (-) | 4       | <=0,25 | (-)     | 8    | (-) | <=1 | (-)  | <=0,25 | <=0,25 | (-) | (-)  | <=20  | <=1  | (-)   | <=4 |
| 8s-4    | <i>Acinetobacter baumannii</i> | (-) | 2       | <=0,25 | (-)     | >=64 | (-) | <=1 | 4(-) | 0,5    | >=16   | (-) | >=32 | <=20  | 4    | 4     | <=4 |
| 8s-5    | <i>Acinetobacter baumannii</i> | (-) | 4       | <=0,25 | (-)     | 16   | (-) | <=1 | 4(-) | <=0,25 | <=0,25 | (-) | <=2  | <=20  | <=1  | <=0,5 | <=4 |
| 8s-6    | <i>Acinetobacter baumannii</i> | (-) | 4       | <=0,25 | (-)     | 8    | (-) | <=1 | 4(-) | <=0,25 | <=0,25 | (-) | <=2  | <=20  | <=1  | <=0,5 | <=4 |
| 8s-7    | <i>Acinetobacter baumannii</i> | (-) | 4       | <=0,25 | (-)     | 8    | (-) | <=1 | 4(-) | <=0,25 | <=0,25 | (-) | <=2  | <=20  | <=1  | <=0,5 | <=4 |

| Isolate | Species                        | AM  | C AZ | CIP   | CP D | CTX | CXM | GM  | ETP  | IPM   | MEM   | MXF   | SAM | SXT  | TE  | TGC  | TZP |
|---------|--------------------------------|-----|------|-------|------|-----|-----|-----|------|-------|-------|-------|-----|------|-----|------|-----|
| 8s-8    | <i>Acinetobacter baumannii</i> | (-) | 4    | ≤0,25 | (-)  | 16  | (-) | ≤1  | 4(-) | ≤0,25 | ≤0,25 | (-)   | ≤2  | ≤20  | ≤1  | ≤0,5 | ≤4  |
| 8w-1    | <i>Escherichia coli</i>        | ≥32 | 16   | 0,5   | ≥8   | ≥64 | ≥64 | ≤1  | ≥8   | ≤0,25 | 1     | ≤0,25 | ≤2  | ≤20  | ≥16 | 4    | 8   |
| 8w-2    | <i>Acinetobacter baumannii</i> | (-) | 16   | ≥4    | (-)  | ≥64 | (-) | ≥16 | 4    | ≤0,25 | ≤0,25 | (-)   | 16  | ≥320 | ≥16 | ≤0,5 | ≤4  |
| 8w-3    | <i>Escherichia coli</i>        | ≥32 | ≤1   | ≥4    | ≥8   | 8   | ≥64 | ≥16 | ≤0,5 | ≤0,25 | ≤0,25 | ≥8    | 16  | ≥320 | ≥16 | ≤0,5 | ≤4  |
| 8w-4    | <i>Escherichia coli</i>        | ≥32 | 4    | ≤0,25 | ≥8   | 8   | ≥64 | ≤1  | ≤0,5 | ≤0,25 | ≤0,25 | 1     | 4   | ≥320 | ≥16 | ≤0,5 | ≤4  |
| 8w-5    | <i>Escherichia coli</i>        | ≥32 | 4    | ≥4    | ≥8   | ≥64 | ≥64 | ≤1  | ≤0,5 | ≤0,25 | ≤0,25 | ≥8    | 16  | ≤20  | ≥16 | ≤0,5 | ≤4  |
| 8w-6    | <i>Escherichia coli</i>        | ≥32 | ≤1   | 1     | ≥8   | 16  | ≥64 | ≤1  | ≤0,5 | ≤0,25 | ≤0,25 | 2     | 16  | ≤20  | ≥16 | ≤0,5 | ≤4  |
| 8w-8    | <i>Escherichia coli</i>        | ≥32 | 4    | ≥4    | ≥8   | 32  | ≥64 | ≤1  | ≤0,5 | ≤0,25 | ≤0,25 | ≥8    | ≤2  | ≤20  | ≤1  | ≤0,5 | ≤4  |
| 8w-9    | <i>Klebsiella pneumoniae</i>   | ≥32 | 4    | 1     | ≥8   | 4   | 16  | ≥16 | ≤0,5 | ≤0,25 | ≤0,25 | 2     | 16  | ≥320 | ≥16 | 1    | ≤4  |
| 8w-10   | <i>Klebsiella pneumoniae</i>   | ≥32 | 4    | ≤0,25 | ≥8   | ≥64 | ≥64 | ≤1  | ≤0,5 | ≤0,25 | ≤0,25 | 0,5   | ≥32 | ≤20  | ≤1  | ≤0,5 | ≤4  |
| 8w-11   | <i>Klebsiella pneumoniae</i>   | ≥32 | 4    | 1     | ≥8   | 4   | 16  | ≥16 | ≤0,5 | ≤0,25 | ≤0,25 | 2     | 16  | ≥320 | ≥16 | 1    | 16  |
| 8w-12   | <i>Acinetobacter baumannii</i> | (-) | 4    | ≤0,25 | (-)  | 8   | (-) | ≤1  | 4(-) | ≤0,25 | ≤0,25 | (-)   | ≤2  | ≤20  | ≤1  | ≤0,5 | ≤4  |
| 8w-13   | <i>Acinetobacter baumannii</i> | (-) | 16   | 1     | (-)  | ≥64 | (-) | ≤1  | 4(-) | ≤0,25 | 0,5   | (-)   | ≤2  | ≥320 | ≥16 | ≤0,5 | 8   |
| 8w-14   | <i>Acinetobacter baumannii</i> | (-) | 4    | ≥4    | (-)  | 16  | (-) | ≤1  | 4(-) | ≤0,25 | ≤0,25 | (-)   | ≤2  | ≤20  | ≥16 | 2    | 8   |
| 8w-15   | <i>Acinetobacter baumannii</i> | (-) | 4    | 2     | (-)  | 16  | (-) | ≤1  | 4(-) | ≤0,25 | ≤0,25 | (-)   | ≤2  | ≤20  | ≥16 | 4    | ≤4  |

| Isolate | Species                        | AM  | C AZ | CIP   | CP D | CTX | CXM | GM | ETP            | IPM   | MEM   | MXF   | SAM | SXT  | TE  | TGC  | TZP |
|---------|--------------------------------|-----|------|-------|------|-----|-----|----|----------------|-------|-------|-------|-----|------|-----|------|-----|
| 8w-16   | <i>Acinetobacter baumannii</i> | (-) | 4    | ≤0,25 | (-)  | 8   | (-) | ≤1 | 4(-)           | ≤0,25 | ≤0,25 | (-)   | ≤2  | ≤20  | ≤1  | ≤0,5 | ≤4  |
| 8w-17   | <i>Acinetobacter baumannii</i> | (-) | 4    | ≤0,25 | (-)  | 8   | (-) | ≤1 | 4(-)           | ≤0,25 | ≤0,25 | (-)   | ≤2  | ≤20  | ≤1  | ≤0,5 | ≤4  |
| 8w-18   | <i>Acinetobacter baumannii</i> | (-) | 8    | 0,5   | (-)  | 32  | (-) | ≤1 | 4(-)           | ≤0,25 | 0,5   | (-)   | ≤2  | ≤20  | 8   | 1    | 64  |
| 8w-19   | <i>Acinetobacter baumannii</i> | (-) | 16   | 2     | (-)  | 16  | (-) | ≤1 | 4(-)           | ≤0,25 | 0,5   | (-)   | ≤2  | ≤20  | 2   | 2    | ≤4  |
| 9w-1    | <i>Escherichia coli</i>        | ≥32 | 4    | ≤0,25 | ≥8   | ≥64 | ≥64 | ≤1 | ≤0,5(-)<br>(-) | ≤0,25 | ≤0,25 | 0,5   | ≤2  | ≤20  | ≤1  | ≤0,5 | ≤4  |
| 9w-2    | <i>Escherichia coli</i>        | ≥32 | 4    | ≤0,25 | ≥8   | ≥64 | ≥64 | ≤1 | ≤0,5<br>≤0,5   | ≤0,25 | ≤0,25 | 1     | ≤2  | ≤20  | ≤1  | ≤0,5 | ≤4  |
| 9w-3    | <i>Escherichia coli</i>        | ≥32 | ≤1   | ≤0,25 | ≥8   | ≥64 | ≥64 | ≤1 | ≤0,5<br>≤0,5   | ≤0,25 | ≤0,25 | ≤0,25 | ≥32 | ≤20  | ≥16 | ≤0,5 | ≤4  |
| 9w-5    | <i>Escherichia coli</i>        | ≥32 | 4    | ≤0,25 | ≥8   | ≥64 | ≥64 | ≤1 | ≤0,5<br>≤0,5   | ≤0,25 | ≤0,25 | 0,5   | ≤2  | ≤20  | ≤1  | ≤0,5 | ≤4  |
| 9w-6    | <i>Escherichia coli</i>        | ≥32 | 4    | ≤0,25 | ≥8   | ≥64 | ≥64 | ≤1 | ≤0,5<br>≤0,5   | ≤0,25 | ≤0,25 | 1     | ≤2  | ≤20  | ≤1  | ≤0,5 | ≤4  |
| 9w-7    | <i>Escherichia coli</i>        | ≥32 | 4    | ≤0,25 | ≥8   | ≥64 | ≥64 | ≤1 | ≤0,5<br>≤0,5   | ≤0,25 | ≤0,25 | 1     | ≤2  | ≤20  | ≤1  | ≤0,5 | ≤4  |
| 9w-9    | <i>Pseudomonas aeruginosa</i>  | (-) | 8    | ≥4    | (-)  | ≥64 | (-) | 8  | (-)<br>≥0,5    | ≥16   | ≥16   | (-)   | (-) | ≥320 | ≥16 | (-)  | 16  |
| 9w-13   | <i>Escherichia coli</i>        | ≥32 | ≤1   | ≤0,25 | ≥8   | ≥64 | ≥64 | ≤1 | ≤0,5           | ≤0,25 | ≤0,25 | ≤0,25 | 16  | ≤20  | ≤1  | ≤0,5 | ≤4  |

| Isolate | Species                        | AM   | C AZ | CIP    | CP D | CTX  | CXM  | GM  | ETP            | IPM    | MEM    | MXF    | SAM  | SXT   | TE   | TGC   | TZP   |
|---------|--------------------------------|------|------|--------|------|------|------|-----|----------------|--------|--------|--------|------|-------|------|-------|-------|
| 9w-14   | <i>Escherichia coli</i>        | >=32 | <=1  | <=0,25 | >=8  | >=64 | >=64 | <=1 | <=0,5          | <=0,25 | <=0,25 | <=0,25 | 16   | <=20  | <=1  | <=0,5 | <=4   |
| 9w-16   | <i>Escherichia coli</i>        | >=32 | <=1  | <=0,25 | >=8  | >=64 | >=64 | <=1 | <=0,5          | <=0,25 | <=0,25 | <=0,25 | 16   | <=20  | <=1  | <=0,5 | <=4   |
| 10w-2   | <i>Escherichia coli</i>        | >=32 | 4    | <=0,25 | >=8  | >=64 | >=64 | <=1 | <=0,5<br><=0,5 | <=0,25 | <=0,25 | 2      | <=2  | >=320 | >=16 | <=0,5 | <=4   |
| 10w-3   | <i>Escherichia coli</i>        | >=32 | 4    | >=4    | >=8  | >=64 | >=64 | <=1 | <=0,5<br><=0,5 | <=0,25 | <=0,25 | >=8    | 16   | <=20  | >=16 | <=0,5 | 8     |
| 10w-4   | <i>Escherichia coli</i>        | 16   | 4    | <=0,25 | >=8  | 8    | 32   | <=1 | 4<=0,5         | <=0,25 | <=0,25 | <=0,25 | <=2  | <=20  | <=1  | <=0,5 | <=4   |
| 10w-5   | <i>Pseudomonas aeruginosa</i>  | (-)  | 4    | <=0,25 | (-)  | 8    | (-)  | <=1 | (-)<br><=0,5   | 2      | 8      | (-)    | (-)  | <=20  | 4    | (-)   | 8     |
| 10w-6   | <i>Acinetobacter baumannii</i> | (-)  | 4    | <=0,25 | (-)  | 8    | (-)  | <=1 | 4<=0,5         | <=0,25 | <=0,25 | (-)    | <=2  | <=20  | <=1  | <=0,5 | <=4   |
| 10w-7   | <i>Acinetobacter baumannii</i> | (-)  | 4    | <=0,25 | (-)  | 16   | (-)  | <=1 | 4(-)           | <=0,25 | <=0,25 | (-)    | <=2  | <=20  | <=1  | <=0,5 | <=4   |
| 10w-8   | <i>Acinetobacter baumannii</i> | (-)  | 4    | <=0,25 | (-)  | 8    | (-)  | <=1 | 4<=0,5         | <=0,25 | <=0,25 | (-)    | <=2  | <=20  | <=1  | <=0,5 | <=4   |
| 10w-9   | <i>Acinetobacter baumannii</i> | (-)  | 4    | <=0,25 | (-)  | 8    | (-)  | <=1 | 4<=0,5         | <=0,25 | <=0,25 | (-)    | <=2  | <=20  | <=1  | <=0,5 | <=4   |
| 11w-2   | <i>Klebsiella oxytoca</i>      | >=32 | >=64 | 1      | >=8  | 4    | 32   | 2   | <=0,54         | 2      | 1      | 2      | >=32 | <=20  | 2    | <=0,5 | >=128 |
| 12w-1   | <i>Escherichia coli</i>        | >=32 | <=1  | >=4    | >=8  | 8    | >=64 | 8   | <=0,5(-)       | <=0,25 | <=0,25 | >=8    | >=32 | >=320 | >=16 | <=0,5 | <=4   |
| 12w-10  | <i>Klebsiella oxytoca</i>      | >=32 | 4    | >=4    | >=8  | 2    | >=64 | 8   | <=0,5(-)       | 2      | <=0,25 | >=8    | >=32 | <=20  | 2    | 2     | 64    |

| Isolate | Species                             | AM   | C<br>AZ | CIP    | CP<br>D | CTX  | CXM  | GM  | ETP      | IPM    | MEM    | MXF    | SAM  | SXT   | TE   | TGC   | TZP   |
|---------|-------------------------------------|------|---------|--------|---------|------|------|-----|----------|--------|--------|--------|------|-------|------|-------|-------|
| 12w-12  | <i>Klebsiella pneumoniae</i>        | >=32 | <=1     | 1      | >=8     | 4    | >=64 | <=1 | <=0,5(-) | <=0,25 | <=0,25 | 2      | >=32 | <=20  | <=1  | 1     | 16    |
| 12w-2   | <i>Escherichia coli</i>             | >=32 | 4       | <=0,25 | >=8     | 16   | >=64 | <=1 | <=0,5(-) | <=0,25 | <=0,25 | <=0,25 | >=32 | >=320 | >=16 | <=0,5 | <=4   |
| 12w-5   | <i>Enterobacter cloacae complex</i> | >=32 | >=64    | 1      | >=8     | >=64 | >=64 | 4   | 2(-)     | 8      | >=16   | 2      | >=32 | <=20  | >=16 | 4     | >=128 |

Supplementary Table 5: Depiction of the plasmid incompatibility groups in the Enterobacteriaceae isolates identified using PlasmidFinder (Carattoli et al., 2014)

| Isolate | Species                      | Plasmid incompatibility groups                                                                    |
|---------|------------------------------|---------------------------------------------------------------------------------------------------|
| 1w-4    | <i>Escherichia coli</i>      | IncFIB(Mar), IncFII(29), IncI1, IncFIB(AP001918), IncHI1B, Col(MP18), ColRNAI, Col156, Col(MG828) |
| 1w-5    | <i>Escherichia coli</i>      | Col(BS512), Col(MGD2), ColRNAI, Col156, Col(MG828)                                                |
| 1w-9    | <i>Klebsiella oxytoca</i>    | IncFIB(K), IncFII(Y), ColRNAI                                                                     |
| 1w-10   | <i>Klebsiella pneumoniae</i> | IncFIA(HI1), IncFIB(K), IncFII(K), Col(MGD2), ColRNAI                                             |
| 2w-3    | <i>Escherichia coli</i>      | IncFII, IncFIB(AP001918), IncB/O/K/Z, ColRNAI                                                     |
| 3w-1    | <i>Escherichia coli</i>      | IncFIC(FII), IncFIA, IncI1, IncFIB(AP001918), IncFIB(pHCM2), ColRNAI                              |
| 3w-10   | <i>Klebsiella oxytoca</i>    | IncR, ColRNAI                                                                                     |
| 3w-4    | <i>Escherichia coli</i>      | IncI1, Col(BS512), ColRNAI, IncX4, Col(MG828)                                                     |
| 3w-9    | <i>Klebsiella pneumoniae</i> | IncFIB(K), IncFII(K), ColRNAI                                                                     |
| 6w-2    | <i>Escherichia coli</i>      | IncI1                                                                                             |
| 7w-11   | <i>Klebsiella pneumoniae</i> | IncFIB(K), IncA/C2                                                                                |
| 7w-2    | <i>Escherichia coli</i>      | IncI1, IncFIB(pHCM2), IncX1, Col8282                                                              |
| 7w-4    | <i>Escherichia coli</i>      | IncFII(pRSB107), IncFIA, IncFIB(AP001918), Col8282, Col156, Col(MG828)                            |
| 8w-1    | <i>Escherichia coli</i>      | IncI1, p0111, ColRNAI, Col156, ColpVC, Col(MG828)                                                 |
| 8w-11   | <i>Klebsiella pneumoniae</i> | IncFIA(HI1), IncR, Col156, ColRNAI                                                                |

| Isolate | Species                  | Plasmid incompatibility groups                                                                      |
|---------|--------------------------|-----------------------------------------------------------------------------------------------------|
| 8w-3    | <i>Escherichia coli</i>  | IncHI2, IncFII(pRSB107), IncI1, IncFIB(AP001918), IncHI2A, TrfA, IncQ1, Col(MG828), Col156, ColRNAI |
| 9w-1    | <i>Escherichia coli</i>  | IncFII(29), IncFIB(AP001918), Col156, IncB/O/K/Z                                                    |
| 10w-3   | <i>Escherichia coli</i>  | IncFII, IncFIB(AP001918), Col(BS512), IncX4, ColRNAI                                                |
| 12w-5   | <i>Citrobacter kobei</i> | IncHI1B(CIT),IncHI1A(CIT),IncFII(K),ColRNAI,ColRNAI                                                 |



Supplementary Table 6: Depiction of virulence determinants present in water isolates grouped by functions. Virulence determinants were identified using the VFDB database. *Acinetobacter baumannii*, *E. kobei*, *K. oxytoca* and *Pseudomonas resinovorans* isolates did not harbour any virulence determinants and are therefore not included in the table. Colour code: black: gene/s present, white: gene/s not present

| Name  | Species        | adherence     |             |     |              |      | Pyocyanin | Alginate | Rhamnolipid | Ibes | Enterobactin | Iron Acquisition, transport |             |     | Yersiniabactin | Flagella Pseudomonas | Alkaline protease | Protease |      | las, rhl | TTSS | Secretion            |     | HSL-1 | ExoA, ExoS, ExoT, ExoY | Toxin |       |       | Pathotype |
|-------|----------------|---------------|-------------|-----|--------------|------|-----------|----------|-------------|------|--------------|-----------------------------|-------------|-----|----------------|----------------------|-------------------|----------|------|----------|------|----------------------|-----|-------|------------------------|-------|-------|-------|-----------|
|       |                | Afa/Dr family | Dr adhesins | ECP | FIC fimbriae | FdeC |           |          |             |      |              | Type 1 fimbriae             | Salmochelin | Shu |                |                      |                   | LasA     | LasB |          |      | xcp secretion system | PLC |       |                        | Sat   | ShET2 |       |           |
| 10w-3 | <i>E. coli</i> |               |             | ■   |              | ■    |           |          |             | ■    |              | ■                           |             |     |                |                      |                   |          |      |          |      |                      |     |       |                        |       |       | ExPEC |           |
| 1w-4  | <i>E. coli</i> |               |             |     |              |      |           |          |             | ■    |              |                             | ■           |     |                |                      |                   |          |      |          |      |                      |     |       |                        |       |       |       |           |
| 1w-5  | <i>E. coli</i> |               |             | ■   |              | ■    |           |          |             | ■    |              |                             |             | ■   |                |                      |                   |          |      |          |      |                      |     |       |                        |       |       | ExPEC |           |
| 2w-3  | <i>E. coli</i> |               |             |     |              |      |           |          |             | ■    |              |                             |             |     |                |                      |                   |          |      |          |      |                      |     |       |                        |       |       |       |           |
| 3w-1  | <i>E. coli</i> |               |             | ■   |              | ■    |           |          |             | ■    |              |                             |             | ■   |                |                      |                   |          |      |          |      |                      |     |       |                        |       |       | UPEC  |           |
| 3w-4  | <i>E. coli</i> |               |             |     |              |      |           |          |             | ■    |              |                             |             |     |                |                      |                   |          |      |          |      |                      |     |       |                        |       |       |       |           |
| 6w-2  | <i>E. coli</i> |               |             |     |              |      |           |          |             | ■    |              |                             |             |     |                |                      |                   |          |      |          |      |                      |     |       |                        |       |       | NMEC  |           |
| 7w-2  | <i>E. coli</i> |               |             | ■   |              | ■    |           |          |             | ■    |              |                             |             |     |                |                      |                   |          |      |          |      |                      |     |       |                        |       |       |       |           |
| 7w-4  | <i>E. coli</i> |               |             |     |              |      |           |          |             | ■    |              |                             |             | ■   |                |                      |                   |          |      |          |      |                      |     |       |                        | ■     |       | ExPEC |           |

| Name  | Species              | adherence     |             |     |              |      |                 | Pyocyanin | Alginate | Rhamnolipid | Ibes | Enterobactin | Pyochelin | Salmochelins | Shu | Yersiniabactin | Flagella Pseudomonas | Alkaline protease | LasA | LasB | las, rhl | TTSS | xcp secretion system | HSI-1 | ExoA, ExoS, ExoT, ExoY | PLC | Sat | ShET2 | Toxin                                         | Pathotype |
|-------|----------------------|---------------|-------------|-----|--------------|------|-----------------|-----------|----------|-------------|------|--------------|-----------|--------------|-----|----------------|----------------------|-------------------|------|------|----------|------|----------------------|-------|------------------------|-----|-----|-------|-----------------------------------------------|-----------|
|       |                      | Afa/Dr family | Dr adhesins | ECP | FIC fimbriae | FdeC | Type 1 fimbriae |           |          |             |      |              |           |              |     |                |                      |                   |      |      |          |      |                      |       |                        |     |     |       |                                               |           |
| 8w-1  | <i>E. coli</i>       |               |             |     |              |      |                 |           |          |             |      |              |           |              |     |                |                      |                   |      |      |          |      |                      |       |                        |     |     |       |                                               |           |
| 8w-3  | <i>E. coli</i>       |               |             |     |              |      |                 |           |          |             |      |              |           |              |     |                |                      |                   |      |      |          |      |                      |       |                        |     |     |       |                                               | ExPEC     |
| 9w-1  | <i>E. coli</i>       |               |             |     |              |      |                 |           |          |             |      |              |           |              |     |                |                      |                   |      |      |          |      |                      |       |                        |     |     |       | DAEC/ExPEC/NMEC                               |           |
| 1w-10 | <i>K. pneumoniae</i> |               |             |     |              |      |                 |           |          |             |      |              |           |              |     |                |                      |                   |      |      |          |      |                      |       |                        |     |     |       |                                               |           |
| 3w-9  | <i>K. pneumoniae</i> |               |             |     |              |      |                 |           |          |             |      |              |           |              |     |                |                      |                   |      |      |          |      |                      |       |                        |     |     |       |                                               |           |
| 7w-11 | <i>K. pneumoniae</i> |               |             |     |              |      |                 |           |          |             |      |              |           |              |     |                |                      |                   |      |      |          |      |                      |       |                        |     |     |       | hypervirulent<br><i>Klebsiella pneumoniae</i> |           |
| 8w-11 | <i>K. pneumoniae</i> |               |             |     |              |      |                 |           |          |             |      |              |           |              |     |                |                      |                   |      |      |          |      |                      |       |                        |     |     |       |                                               |           |
| 9w-9  | <i>P. aeruginosa</i> |               |             |     |              |      |                 |           |          |             |      |              |           |              |     |                |                      |                   |      |      |          |      |                      |       |                        |     |     |       |                                               |           |

Supplementary Table 7: Source determination for *Acinetobacter* isolates, using the PubMLST database and the Pasteur MLST scheme (<https://pubmlst.org/abaumannii/>); \* these sequence types were newly assigned in this study, therefore only one isolate of this ST is present in the PubMLST database.

| Isolate    | MLST  | Number of isolates in PubMLST | Source |        |             |         |
|------------|-------|-------------------------------|--------|--------|-------------|---------|
|            |       |                               | human  | animal | environment | unknown |
| 1w-12      | 203   | 4                             | 3      | -      | -           | 1       |
| 2w-4       | 155   | 11                            | 2      | 9      | -           | 1       |
| 3w-14      | 1017  | 1                             | -      | 1      | -           | -       |
| 6s-1       | 1321* | 1*                            | -      | -      | 1           | -       |
| 6w-10      | 1322* | 1*                            | -      | -      | 1           | -       |
| 7w-12      | 647   | 1                             | -      | -      | 1           | -       |
| 8s-2, 8s-4 | 1112  | 1                             | -      | -      | -           | 1       |
| 8w-16      | 690   | 4                             | -      | 3      | -           | 1       |
| 8w-19      | 1323* | 1*                            | -      | -      | 1           | -       |
| 10w-8      | 1324* | 1*                            | -      | -      | 1           | -       |

Supplementary Table 8: Source determination of sequenced isolates using BacWGSTdb.

| Isolate | Species                        | Isolates related by cgMLST (range of cgMLST allele difference) | Source of closest relative | Source of related isolates |        |         |
|---------|--------------------------------|----------------------------------------------------------------|----------------------------|----------------------------|--------|---------|
|         |                                |                                                                |                            | human                      | animal | unknown |
| 1w-5    | <i>Escherichia coli</i>        | 25 (79-187)                                                    | unknown                    | 11                         | 3      | 11      |
| 1w-10   | <i>Klebsiella pneumoniae</i>   | 3 (66-175)                                                     | human                      | 3                          | 0      | 0       |
| 1w-12   | <i>Acinetobacter baumannii</i> | 1 (51)                                                         | human                      | 1                          | 0      | 0       |
| 2w-3    | <i>Escherichia coli</i>        | 15 (119-194)                                                   | animal                     | 8                          | 4      | 3       |
| 3w-1    | <i>Escherichia coli</i>        | 1 (131)                                                        | animal                     | 0                          | 1      | 0       |
| 3w-4    | <i>Escherichia coli</i>        | 6 (148-194)                                                    | animal                     | 4                          | 2      | 0       |
| 3w-9    | <i>Klebsiella pneumoniae</i>   | 222 (13-167)                                                   | human                      | 164                        | 5      | 55      |
| 7w-4    | <i>Escherichia coli</i>        | 82 (63-200)                                                    | human                      | 67                         | 3      | 12      |
| 8w-1    | <i>Escherichia coli</i>        | 3 (113-195)                                                    | animal                     | 0                          | 3      | 0       |
| 8w-3    | <i>Escherichia coli</i>        | 3 Isolates cgMLST (107-192)                                    | animal                     | 1                          | 1      | 1       |

|       |                         |                                                      |        |    |   |   |
|-------|-------------------------|------------------------------------------------------|--------|----|---|---|
| 9w-1  | <i>Escherichia coli</i> | 23 isolates cgMLST (97-188 cgMLST alleles different) | human  | 21 | 0 | 2 |
| 10w-3 | <i>Escherichia coli</i> | 6 isolates cgMLST (151-197 cgMLST allele difference) | animal | 4  | 2 | 0 |

## 2.1 Supplementary Figures

**Supplementary Figure 1.** Depiction of the sampling sites. Water samples are marked in blue, sediment samples in red. Sampling site 9 is not shown due to protection of data privacy.

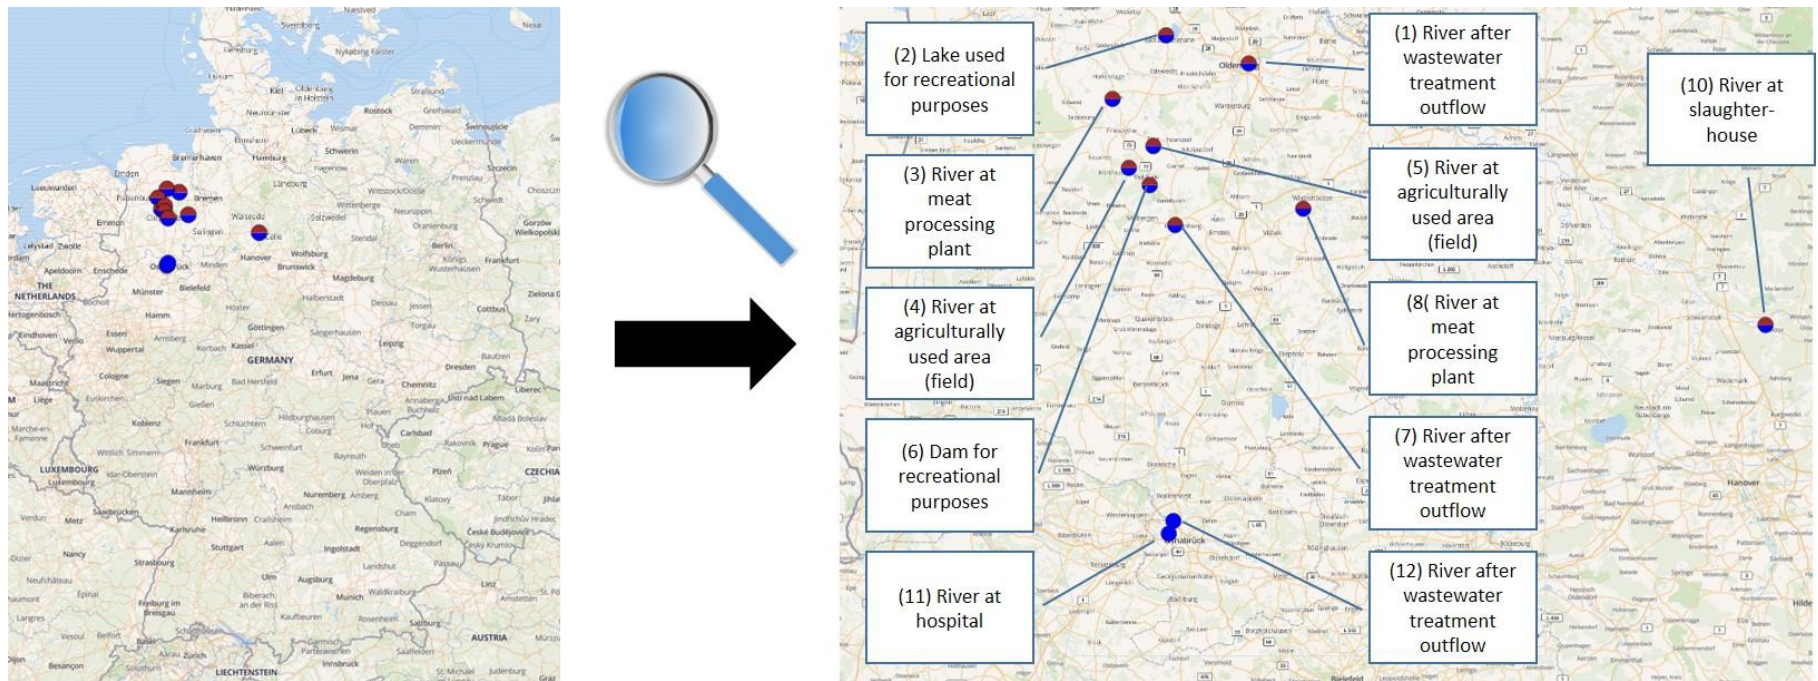

**Supplementary Figure 2: Abundance of plasmid incompatibility groups among Enterobacterales.** Plasmid incompatibility groups were determined using PlasmidFinder (Carattoli et al., 2014)

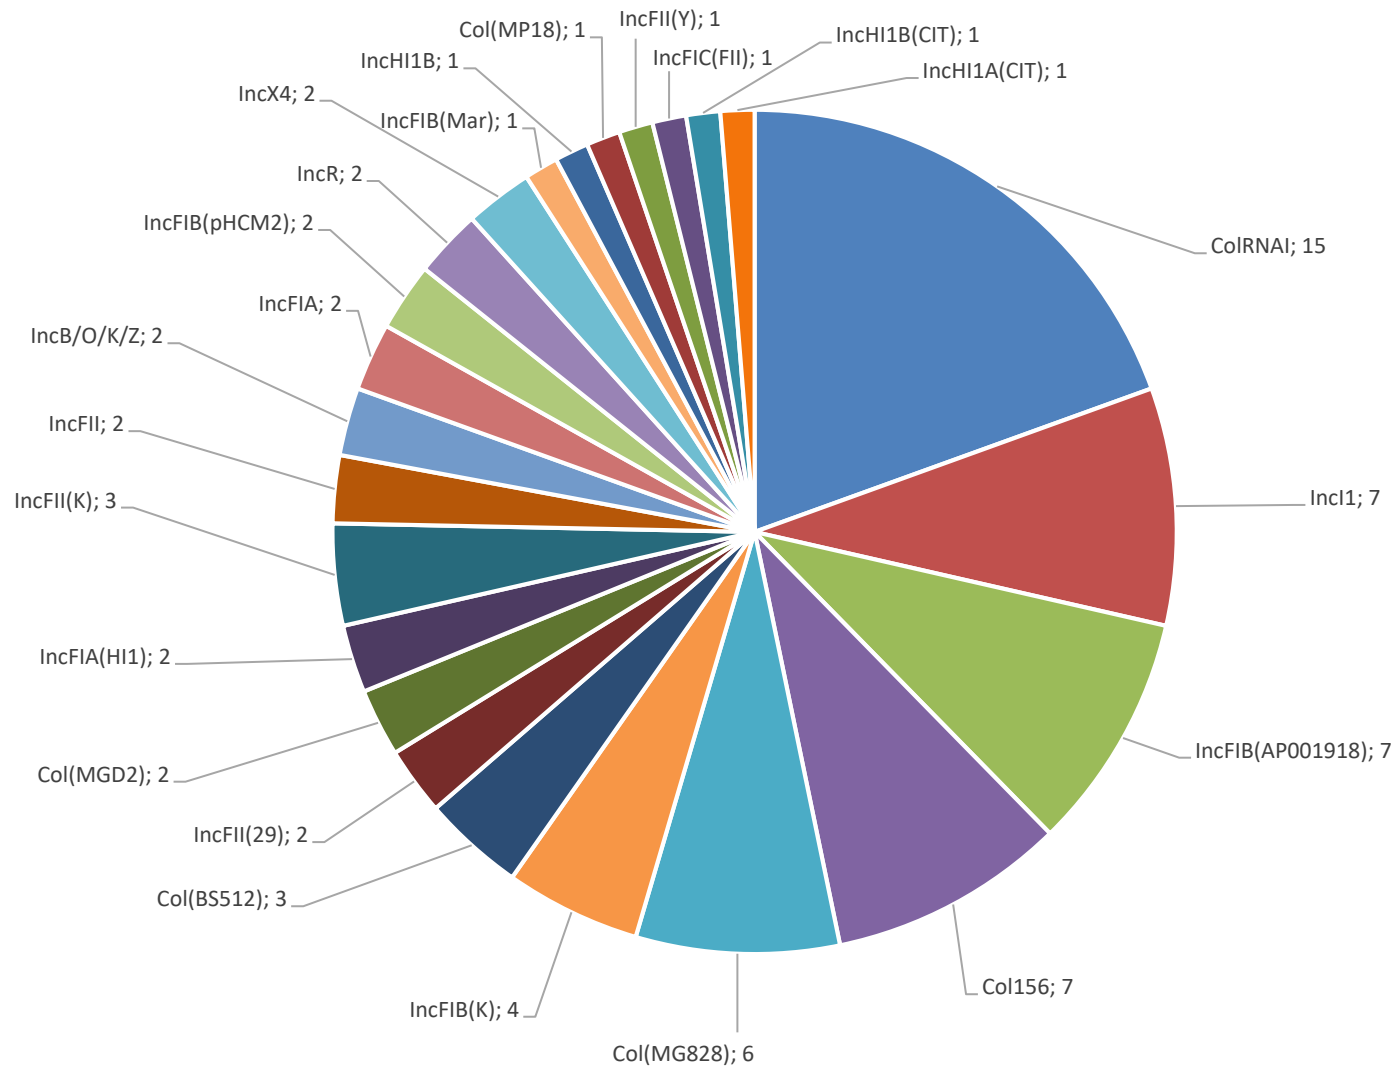





## Supplementary References

Carattoli, A., Zankari, E., García-Fernández, A., Voldby Larsen, M., Lund, O., Villa, L., et al. (2014). In silico detection and typing of plasmids using PlasmidFinder and plasmid multilocus sequence typing. *Antimicrob. Agents Chemother.* 58, 3895–903. doi:10.1128/AAC.02412-14.
